# Supplementary material for: Phenotypic Characterization, Evaluation, and Classification of Cassava (Manihot esculenta Crantz) Accessions in Ethiopia
Source: Hindawi journal article supplement (doi:10.1155/2023/1559070), 2023-08-28
Supplement: f1 [file 1559070.f1.docx]

TABLE S1: Showing the 64 cassava accessions and their score of qualitative characteristics.

| Characteristics | | | | | | | | | | | | | | |
| --- | --- | --- | --- | --- | --- | --- | --- | --- | --- | --- | --- | --- | --- | --- |
| ACC | CAL | PAL | SCL | LR | PC | LC | NLL | LM | CLV | OP | PFS | CSC | CSE | CSEX |
| G1 | 9 | 0 | 2 | 5 | 5 | 5 | 7 | 3 | 3 | 3 | 5 | 1 | 4 | 7 |
| G2 | 7 | 1 | 2 | 5 | 1 | 3 | 7 | 3 | 7 | 3 | 5 | 2 | 2 | 7 |
| G3 | 7 | 0 | 5 | 5 | 5 | 3 | 7 | 3 | 7 | 3 | 3 | 2 | 4 | 7 |
| G4 | 7 | 1 | 4 | 4 | 1 | 5 | 9 | 3 | 3 | 3 | 3 | 2 | 4 | 7 |
| G5 | 7 | 1 | 5 | 4 | 3 | 3 | 7 | 3 | 7 | 3 | 3 | 2 | 4 | 7 |
| G6 | 7 | 1 | 5 | 5 | 3 | 5 | 9 | 3 | 3 | 3 | 5 | 2 | 4 | 7 |
| G7 | 9 | 1 | 6 | 1 | 7 | 3 | 7 | 3 | 5 | 3 | 3 | 2 | 2 | 4 |
| G8 | 9 | 0 | 2 | 5 | 7 | 5 | 7 | 3 | 3 | 3 | 3 | 2 | 4 | 7 |
| G9 | 5 | 0 | 5 | 2 | 7 | 3 | 9 | 3 | 3 | 3 | 5 | 1 | 1 | 3 |
| G10 | 7 | 0 | 2 | 4 | 3 | 5 | 9 | 3 | 3 | 3 | 3 | 2 | 1 | 4 |
| G11 | 7 | 1 | 5 | 5 | 5 | 5 | 7 | 3 | 3 | 3 | 5 | 2 | 1 | 7 |
| G12 | 5 | 0 | 5 | 4 | 7 | 3 | 5 | 3 | 3 | 3 | 3 | 2 | 1 | 4 |
| G13 | 7 | 0 | 2 | 2 | 9 | 3 | 7 | 3 | 3 | 3 | 3 | 2 | 2 | 7 |
| G14 | 7 | 1 | 4 | 4 | 1 | 5 | 9 | 3 | 3 | 3 | 3 | 2 | 1 | 7 |
| G15 | 9 | 1 | 2 | 3 | 1 | 5 | 5 | 3 | 3 | 3 | 3 | 2 | 4 | 4 |
| G16 | 7 | 1 | 5 | 3 | 7 | 5 | 9 | 7 | 3 | 3 | 3 | 2 | 4 | 7 |
| G17 | 9 | 0 | 4 | 4 | 7 | 5 | 7 | 7 | 3 | 3 | 5 | 2 | 1 | 4 |
| G18 | 9 | 1 | 2 | 4 | 7 | 3 | 7 | 7 | 7 | 5 | 5 | 2 | 4 | 3 |
| G19 | 9 | 0 | 4 | 1 | 9 | 3 | 7 | 7 | 5 | 3 | 3 | 2 | 1 | 7 |
| G20 | 9 | 0 | 4 | 1 | 9 | 3 | 7 | 7 | 3 | 3 | 5 | 2 | 4 | 7 |
| G21 | 5 | 0 | 4 | 5 | 3 | 3 | 9 | 7 | 3 | 3 | 3 | 2 | 4 | 7 |
| G22 | 9 | 1 | 3 | 5 | 3 | 3 | 7 | 3 | 3 | 3 | 3 | 2 | 4 | 4 |
| G23 | 9 | 1 | 4 | 5 | 1 | 3 | 7 | 3 | 3 | 3 | 5 | 2 | 4 | 5 |
| G24 | 9 | 0 | 6 | 5 | 3 | 5 | 7 | 7 | 3 | 3 | 5 | 2 | 4 | 4 |
| G25 | 9 | 0 | 5 | 2 | 7 | 3 | 7 | 7 | 7 | 3 | 5 | 1 | 4 | 4 |
| G26 | 9 | 1 | 4 | 2 | 7 | 3 | 9 | 7 | 7 | 3 | 5 | 2 | 4 | 4 |
| G27 | 9 | 1 | 2 | 4 | 7 | 5 | 7 | 7 | 3 | 3 | 3 | 2 | 4 | 5 |
| G28 | 7 | 1 | 5 | 2 | 3 | 3 | 7 | 7 | 3 | 1 | 5 | 2 | 1 | 7 |
| G29 | 9 | 1 | 2 | 3 | 1 | 3 | 9 | 7 | 3 | 3 | 5 | 2 | 4 | 4 |
| G30 | 5 | 1 | 2 | 4 | 1 | 3 | 7 | 3 | 3 | 3 | 5 | 2 | 4 | 7 |
| G31 | 7 | 0 | 5 | 1 | 5 | 5 | 7 | 7 | 3 | 1 | 3 | 2 | 4 | 7 |
| G32 | 9 | 1 | 1 | 2 | 7 | 3 | 7 | 3 | 7 | 3 | 5 | 2 | 4 | 7 |
| G33 | 7 | 0 | 2 | 4 | 1 | 5 | 9 | 7 | 3 | 1 | 5 | 2 | 1 | 7 |
| G34 | 9 | 1 | 4 | 3 | 9 | 5 | 7 | 3 | 3 | 1 | 3 | 2 | 2 | 4 |
| G35 | 7 | 1 | 1 | 3 | 7 | 5 | 9 | 7 | 7 | 1 | 3 | 2 | 4 | 7 |
| G36 | 9 | 0 | 1 | 2 | 1 | 3 | 5 | 3 | 3 | 1 | 5 | 2 | 4 | 4 |
| G37 | 7 | 1 | 3 | 4 | 7 | 3 | 9 | 7 | 3 | 1 | 3 | 2 | 4 | 7 |
| G38 | 7 | 1 | 5 | 2 | 3 | 3 | 7 | 7 | 3 | 1 | 5 | 2 | 4 | 7 |
| G39 | 9 | 1 | 4 | 1 | 7 | 5 | 9 | 3 | 3 | 3 | 5 | 2 | 4 | 7 |
| G40 | 7 | 1 | 4 | 1 | 7 | 5 | 7 | 3 | 3 | 3 | 5 | 2 | 1 | 4 |
| G41 | 7 | 1 | 5 | 4 | 3 | 5 | 9 | 7 | 3 | 3 | 5 | 2 | 2 | 7 |
| G42 | 9 | 1 | 5 | 4 | 7 | 5 | 7 | 7 | 3 | 1 | 3 | 2 | 4 | 4 |
| G43 | 7 | 0 | 4 | 4 | 9 | 3 | 9 | 3 | 3 | 1 | 5 | 2 | 4 | 4 |
| G44 | 9 | 0 | 5 | 3 | 1 | 5 | 5 | 3 | 3 | 1 | 5 | 2 | 4 | 7 |
| G45 | 7 | 0 | 4 | 4 | 7 | 5 | 9 | 3 | 3 | 1 | 3 | 2 | 1 | 7 |
| G46 | 9 | 0 | 5 | 4 | 1 | 3 | 9 | 7 | 3 | 3 | 5 | 2 | 2 | 7 |
| G47 | 7 | 0 | 2 | 4 | 7 | 3 | 9 | 3 | 5 | 1 | 5 | 2 | 4 | 7 |
| G48 | 7 | 0 | 5 | 4 | 5 | 5 | 9 | 7 | 3 | 1 | 5 | 2 | 4 | 7 |
| G49 | 9 | 0 | 5 | 5 | 1 | 5 | 7 | 7 | 3 | 5 | 5 | 2 | 2 | 7 |
| G50 | 7 | 1 | 5 | 4 | 7 | 5 | 9 | 3 | 3 | 3 | 5 | 2 | 1 | 7 |
| G51 | 7 | 0 | 2 | 4 | 9 | 3 | 9 | 7 | 3 | 1 | 5 | 2 | 4 | 7 |
| G52 | 9 | 1 | 6 | 3 | 3 | 5 | 7 | 7 | 5 | 1 | 5 | 2 | 4 | 5 |
| G53 | 7 | 0 | 5 | 4 | 7 | 3 | 9 | 3 | 3 | 3 | 5 | 2 | 4 | 4 |
| G54 | 9 | 0 | 4 | 3 | 1 | 5 | 7 | 7 | 3 | 5 | 5 | 2 | 4 | 7 |
| G55 | 7 | 0 | 5 | 4 | 3 | 5 | 7 | 7 | 3 | 3 | 3 | 2 | 4 | 4 |
| G56 | 9 | 1 | 5 | 4 | 1 | 5 | 7 | 7 | 3 | 1 | 5 | 2 | 1 | 4 |
| G57 | 9 | 1 | 5 | 4 | 3 | 5 | 7 | 7 | 3 | 3 | 5 | 2 | 2 | 7 |
| G58 | 9 | 1 | 2 | 4 | 3 | 5 | 9 | 7 | 3 | 3 | 5 | 2 | 4 | 7 |
| G59 | 7 | 1 | 5 | 4 | 3 | 5 | 9 | 7 | 5 | 1 | 5 | 2 | 4 | 7 |
| G60 | 7 | 1 | 5 | 4 | 3 | 5 | 9 | 7 | 5 | 3 | 5 | 2 | 1 | 7 |
| G61 | 7 | 0 | 5 | 3 | 7 | 3 | 7 | 7 | 5 | 1 | 5 | 2 | 1 | 7 |
| G62 | 9 | 0 | 2 | 4 | 7 | 3 | 7 | 3 | 3 | 5 | 5 | 2 | 4 | 7 |
| G63 | 7 | 1 | 2 | 2 | 7 | 5 | 7 | 3 | 5 | 1 | 5 | 2 | 1 | 7 |
| G64 | 7 | 0 | 2 | 4 | 3 | 5 | 7 | 7 | 3 | 3 | 5 | 2 | 2 | 7 |

TABLE S1: Continued.

| Characteristics | | | | | | | | | | | | | | | | |
| --- | --- | --- | --- | --- | --- | --- | --- | --- | --- | --- | --- | --- | --- | --- | --- | --- |
| ACC | GHS | DBLS | CEB | SM | LS | BH | SP | FR | SED | ROC | ROS | ECS | CRP | CRC | CEP | TRE |
| G1 | 1 | 3 | 3 | 2 | 3 | 1 | 4 | 1 | 1 | 1 | 2 | 1 | 2 | 3 | 2 | 3 |
| G2 | 1 | 3 | 3 | 2 | 5 | 2 | 4 | 1 | 1 | 1 | 2 | 2 | 1 | 1 | 2 | 3 |
| G3 | 1 | 3 | 3 | 2 | 3 | 2 | 4 | 1 | 1 | 1 | 2 | 1 | 1 | 3 | 2 | 3 |
| G4 | 1 | 3 | 3 | 2 | 3 | 1 | 4 | 1 | 1 | 1 | 2 | 1 | 2 | 3 | 2 | 3 |
| G5 | 1 | 3 | 3 | 2 | 3 | 3 | 3 | 1 | 1 | 1 | 2 | 1 | 2 | 3 | 2 | 3 |
| G6 | 1 | 7 | 3 | 2 | 3 | 1 | 4 | 1 | 1 | 1 | 3 | 1 | 1 | 2 | 2 | 3 |
| G7 | 1 | 3 | 5 | 1 | 5 | 3 | 1 | 1 | 1 | 1 | 4 | 3 | 2 | 3 | 1 | 3 |
| G8 | 1 | 3 | 5 | 2 | 3 | 4 | 1 | 1 | 1 | 1 | 3 | 3 | 2 | 3 | 2 | 7 |
| G9 | 1 | 3 | 5 | 2 | 5 | 3 | 2 | 1 | 1 | 1 | 2 | 3 | 1 | 1 | 1 | 7 |
| G10 | 2 | 3 | 3 | 2 | 3 | 4 | 1 | 1 | 1 | 1 | 3 | 1 | 2 | 3 | 2 | 3 |
| G11 | 1 | 3 | 3 | 2 | 3 | 1 | 4 | 1 | 1 | 1 | 4 | 1 | 2 | 2 | 1 | 3 |
| G12 | 1 | 3 | 5 | 1 | 5 | 2 | 1 | 1 | 1 | 1 | 3 | 4 | 1 | 1 | 2 | 3 |
| G13 | 1 | 3 | 5 | 2 | 3 | 4 | 1 | 1 | 1 | 1 | 4 | 2 | 2 | 1 | 1 | 3 |
| G14 | 2 | 5 | 3 | 2 | 3 | 4 | 3 | 1 | 1 | 1 | 2 | 2 | 2 | 3 | 2 | 3 |
| G15 | 1 | 5 | 3 | 1 | 3 | 3 | 2 | 1 | 1 | 1 | 2 | 1 | 1 | 1 | 2 | 3 |
| G16 | 1 | 5 | 5 | 2 | 3 | 4 | 2 | 1 | 1 | 1 | 2 | 3 | 2 | 3 | 1 | 7 |
| G17 | 1 | 5 | 5 | 2 | 3 | 4 | 1 | 1 | 1 | 1 | 4 | 3 | 1 | 2 | 2 | 7 |
| G18 | 1 | 7 | 5 | 2 | 3 | 3 | 3 | 0 | 0 | 1 | 2 | 4 | 2 | 2 | 2 | 3 |
| G19 | 2 | 3 | 5 | 2 | 3 | 3 | 2 | 0 | 0 | 1 | 3 | 3 | 1 | 3 | 2 | 3 |
| G20 | 1 | 5 | 5 | 2 | 5 | 4 | 2 | 1 | 1 | 1 | 2 | 2 | 2 | 3 | 1 | 3 |
| G21 | 2 | 5 | 3 | 2 | 3 | 2 | 4 | 1 | 1 | 1 | 1 | 2 | 1 | 3 | 2 | 3 |
| G22 | 2 | 5 | 5 | 1 | 5 | 3 | 2 | 1 | 1 | 1 | 1 | 1 | 2 | 2 | 2 | 3 |
| G23 | 1 | 5 | 3 | 2 | 3 | 2 | 1 | 1 | 1 | 1 | 3 | 1 | 3 | 2 | 2 | 7 |
| G24 | 2 | 5 | 3 | 1 | 5 | 4 | 2 | 1 | 1 | 1 | 3 | 3 | 1 | 1 | 2 | 7 |
| G25 | 1 | 3 | 5 | 2 | 3 | 2 | 1 | 1 | 1 | 1 | 4 | 3 | 2 | 3 | 1 | 3 |
| G26 | 1 | 5 | 5 | 2 | 3 | 2 | 1 | 1 | 1 | 1 | 1 | 2 | 1 | 3 | 1 | 3 |
| G27 | 1 | 3 | 5 | 2 | 3 | 3 | 3 | 1 | 1 | 1 | 1 | 3 | 1 | 3 | 2 | 7 |
| G28 | 2 | 5 | 3 | 1 | 3 | 4 | 2 | 1 | 1 | 1 | 3 | 3 | 1 | 1 | 2 | 7 |
| G29 | 2 | 3 | 3 | 1 | 3 | 3 | 2 | 1 | 1 | 1 | 2 | 2 | 1 | 1 | 1 | 7 |
| G30 | 1 | 5 | 3 | 2 | 3 | 4 | 3 | 1 | 1 | 1 | 3 | 1 | 1 | 3 | 2 | 3 |
| G31 | 1 | 3 | 3 | 2 | 3 | 4 | 3 | 1 | 1 | 1 | 2 | 3 | 2 | 2 | 2 | 7 |
| G32 | 1 | 5 | 5 | 2 | 3 | 2 | 1 | 1 | 1 | 1 | 2 | 2 | 2 | 3 | 1 | 3 |
| G33 | 1 | 5 | 3 | 2 | 3 | 1 | 4 | 1 | 1 | 1 | 3 | 1 | 1 | 1 | 2 | 3 |
| G34 | 1 | 3 | 5 | 1 | 5 | 4 | 2 | 1 | 1 | 1 | 2 | 3 | 1 | 1 | 2 | 7 |
| G35 | 1 | 5 | 5 | 2 | 5 | 3 | 2 | 1 | 1 | 1 | 2 | 3 | 1 | 1 | 1 | 7 |
| G36 | 2 | 3 | 3 | 1 | 3 | 3 | 2 | 1 | 1 | 1 | 4 | 2 | 3 | 1 | 2 | 3 |
| G37 | 2 | 3 | 5 | 2 | 3 | 3 | 2 | 0 | 0 | 1 | 1 | 3 | 1 | 2 | 1 | 3 |
| G38 | 2 | 5 | 3 | 2 | 3 | 3 | 2 | 1 | 1 | 1 | 1 | 1 | 1 | 3 | 2 | 3 |
| G39 | 1 | 3 | 5 | 2 | 5 | 3 | 2 | 1 | 1 | 1 | 2 | 2 | 2 | 3 | 1 | 7 |
| G40 | 1 | 5 | 5 | 1 | 3 | 4 | 1 | 1 | 1 | 1 | 1 | 2 | 3 | 2 | 1 | 7 |
| G41 | 1 | 3 | 3 | 2 | 3 | 1 | 4 | 1 | 1 | 1 | 2 | 1 | 1 | 3 | 1 | 3 |
| G42 | 1 | 5 | 5 | 2 | 3 | 3 | 1 | 1 | 1 | 1 | 2 | 2 | 2 | 3 | 1 | 7 |
| G43 | 1 | 3 | 5 | 1 | 5 | 2 | 1 | 1 | 1 | 1 | 3 | 1 | 5 | 3 | 1 | 3 |
| G44 | 1 | 3 | 3 | 2 | 5 | 2 | 2 | 1 | 1 | 1 | 3 | 1 | 1 | 2 | 2 | 3 |
| G45 | 1 | 3 | 5 | 2 | 3 | 2 | 3 | 1 | 1 | 1 | 4 | 1 | 2 | 3 | 1 | 7 |
| G46 | 1 | 3 | 3 | 2 | 5 | 2 | 3 | 1 | 1 | 1 | 1 | 1 | 1 | 2 | 1 | 7 |
| G47 | 1 | 5 | 5 | 2 | 5 | 2 | 3 | 1 | 1 | 1 | 3 | 1 | 1 | 3 | 2 | 7 |
| G48 | 2 | 7 | 5 | 1 | 3 | 2 | 3 | 1 | 1 | 1 | 1 | 2 | 1 | 1 | 1 | 3 |
| G49 | 1 | 7 | 3 | 2 | 5 | 2 | 1 | 1 | 1 | 1 | 1 | 2 | 1 | 1 | 1 | 3 |
| G50 | 1 | 5 | 5 | 2 | 3 | 2 | 2 | 1 | 1 | 1 | 2 | 2 | 2 | 1 | 1 | 3 |
| G51 | 1 | 5 | 5 | 2 | 5 | 2 | 3 | 1 | 1 | 1 | 1 | 3 | 1 | 2 | 1 | 3 |
| G52 | 1 | 5 | 3 | 2 | 5 | 2 | 1 | 1 | 1 | 1 | 2 | 2 | 2 | 1 | 2 | 3 |
| G53 | 1 | 7 | 3 | 2 | 3 | 3 | 2 | 0 | 0 | 1 | 1 | 2 | 1 | 1 | 1 | 7 |
| G54 | 1 | 7 | 3 | 2 | 3 | 4 | 1 | 0 | 0 | 1 | 2 | 2 | 1 | 2 | 1 | 3 |
| G55 | 1 | 5 | 3 | 2 | 3 | 2 | 1 | 1 | 1 | 1 | 1 | 3 | 2 | 1 | 1 | 3 |
| G56 | 1 | 3 | 3 | 2 | 3 | 1 | 4 | 1 | 1 | 1 | 3 | 3 | 1 | 2 | 1 | 7 |
| G57 | 2 | 3 | 3 | 2 | 5 | 3 | 2 | 1 | 1 | 1 | 2 | 1 | 2 | 3 | 1 | 3 |
| G58 | 1 | 7 | 3 | 2 | 5 | 3 | 2 | 1 | 1 | 1 | 3 | 2 | 1 | 2 | 1 | 3 |
| G59 | 1 | 7 | 3 | 1 | 5 | 3 | 4 | 1 | 1 | 2 | 2 | 2 | 2 | 1 | 2 | 3 |
| G60 | 1 | 5 | 3 | 2 | 3 | 1 | 3 | 1 | 1 | 1 | 2 | 1 | 1 | 3 | 1 | 3 |
| G61 | 2 | 7 | 3 | 2 | 5 | 3 | 1 | 1 | 1 | 2 | 4 | 3 | 5 | 3 | 2 | 7 |
| G62 | 1 | 5 | 5 | 2 | 5 | 4 | 1 | 0 | 0 | 2 | 4 | 2 | 2 | 2 | 2 | 3 |
| G63 | 2 | 3 | 5 | 2 | 5 | 3 | 1 | 1 | 1 | 1 | 2 | 4 | 2 | 1 | 2 | 7 |
| G64 | 1 | 5 | 3 | 2 | 5 | 4 | 4 | 1 | 1 | 2 | 2 | 1 | 1 | 3 | 2 | 3 |

Key: CAL= color of apical leaves, PAL= pubescence on apical leaves, SCL= shape of central leaflet, LR= leaf retention, PC= petiole color, LC= leaf color, NLL=number of leaf lobe, LM= lobe margins, CLV= color of leaf vein, OP= orientation of petiole, PFS= prominence of foliar scars, CSC= color of stem cortex, CSE= color of stem epidermis, CSEX= color of stem exterior, GHS= growth habit of stem, DBLS=distance between leaf scars, CEB= color of end branches of adult plant, SM= stipule margin, LS = length of stipules, BH= branching habit, SP= shape of plant, FR= fruit, SED= seed, ROC=root constrictions, ROS= root shape, ECS= external color of storage root, CRP= color of root pulp, CRC= color of root cortex, CEP= cortex: ease of peeling, and TRE= texture of root epidermis.


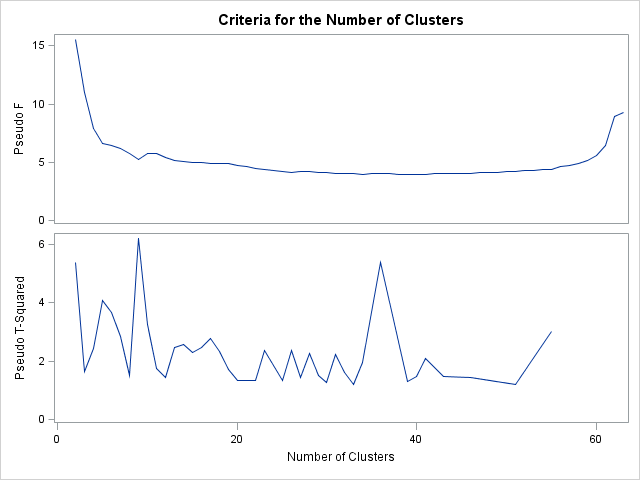


FIGURE S1: showing criteria for the number of clusters based on a pseudo-F and pseudo-t-squared values.
